# Supplementary material
Source: Springer Nature journal article supplement (https://www.springermedizin.de/resource/supplementary/12967_2009_376_MOESM10_ESM.pdf/9576346)

Sample Identification Numbers

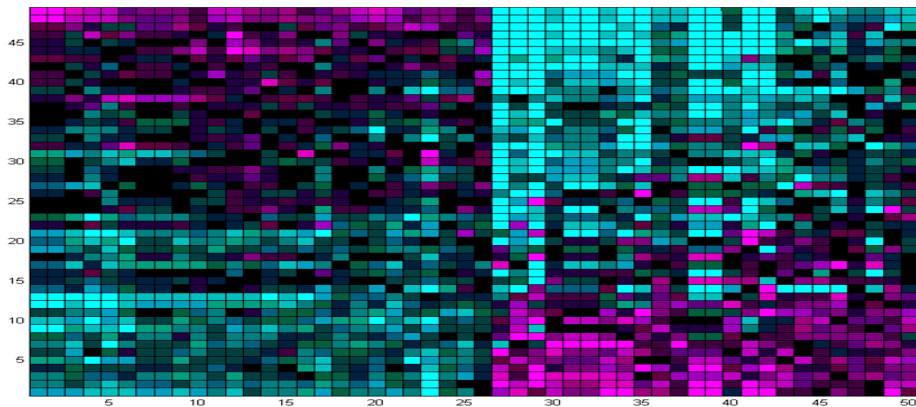

“TRUTH”

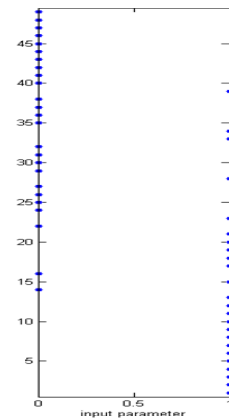

Sample Identification Numbers

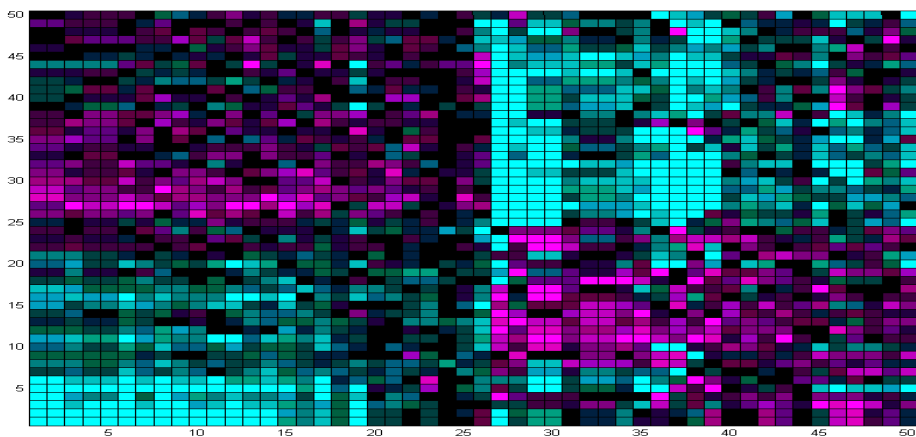

Signatures

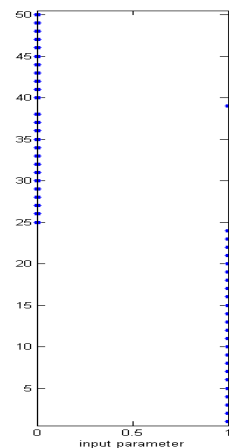

Supplement: MOESM10 [file 9576346]
